# Supplementary material for: Highly active Fe–N-doped porous hollow carbon nanospheres as oxygen reduction electrocatalysts in both acidic and alkaline media
Source: Royal Society of Chemistry journal article supplement (doi:10.1039/d0nr02763d), 2020-01-01
Supplement: d0nr02763d1.pdf [file d0nr02763d1.pdf]

## Supporting Information

# Highly Active Fe-N-doped Porous Hollow Carbon Nanospheres as Oxygen Reduction Electrocatalysts in Both Acidic and Alkaline Media

Meng-geng Hao,<sup>a,b</sup> Rong-min Dun,<sup>a,b</sup> Yu-miao Su<sup>a</sup> and Wen-mu Li<sup>\*a</sup>

<sup>a</sup> Key Laboratory of Optoelectronic Materials Chemistry and Physics, Fujian Institute of Research on the Structure of Matter, Chinese Academy of Sciences, Fuzhou 350002, P. R. China

<sup>b</sup> University of Chinese Academy of Sciences, Beijing 100049, China

E-mail: liwm@fjirsm.ac.cn

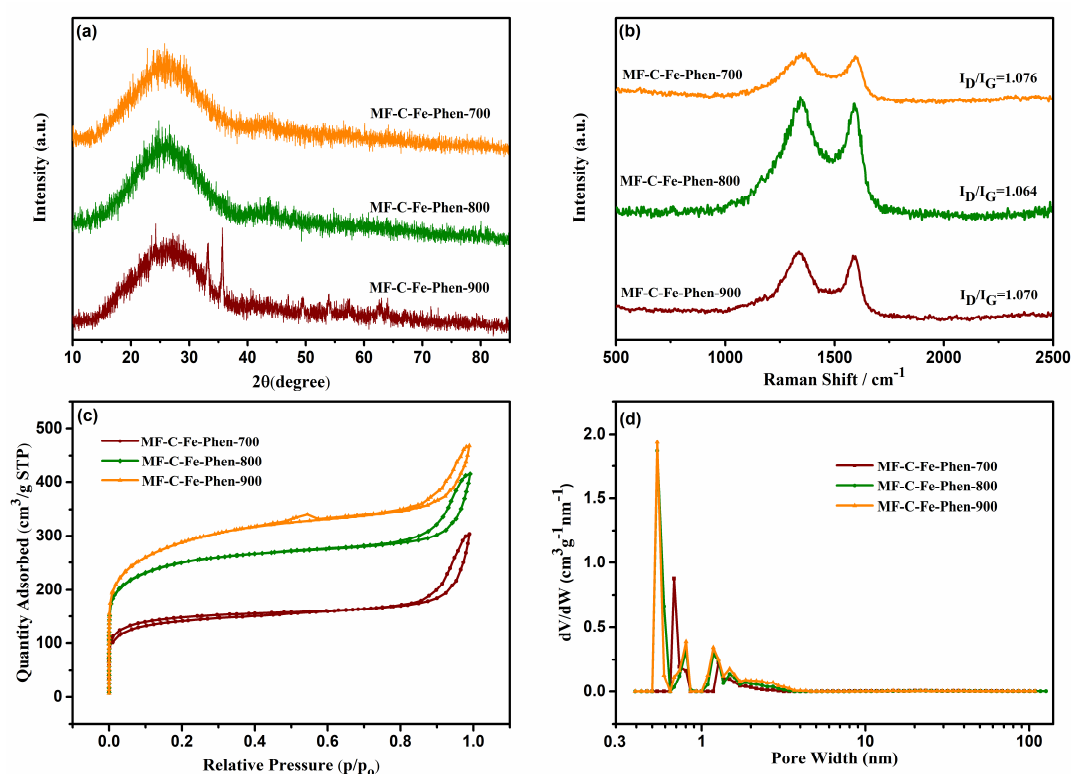

**Figure S1** (a) XRD pattern of MF-C-Fe-Phen-700, MF-C-Fe-Phen-800, MF-C-Fe-Phen-900. (b) Raman spectra of MF-C-Fe-Phen-700, MF-C-Fe-Phen-800, MF-C-Fe-Phen-900. (c) Nitrogen adsorption-desorption isotherms of MF-C-Fe-Phen-700, MF-C-Fe-Phen-800 and MF-C-Fe-Phen-900. (d) The corresponding pore size distributions were calculated by Nonlocal Density Functional Theory (DFT) method.

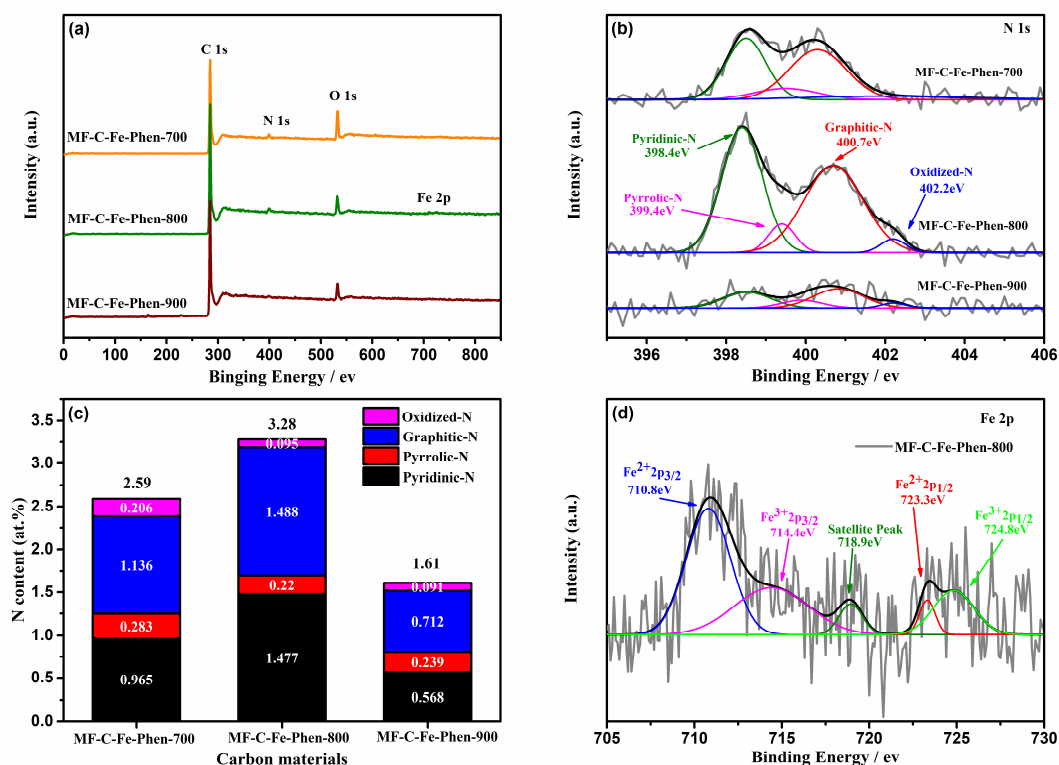

**Figure S2** (a) XPS survey spectra of MF-C-Fe-Phen-700, MF-C-Fe-Phen-800, MF-C-Fe-Phen-900. (b) The corresponding high-resolution XPS spectra of N1s. (c) The atomic contents of different nitrogen types in the MF-C-Fe-Phen-700, MF-C-Fe-Phen-800 and MF-C-Fe-Phen-900 obtained from the deconvoluted N1s peaks. (d) High-resolution XPS spectra of Fe 2p for MF-C-Fe-Phen-800.

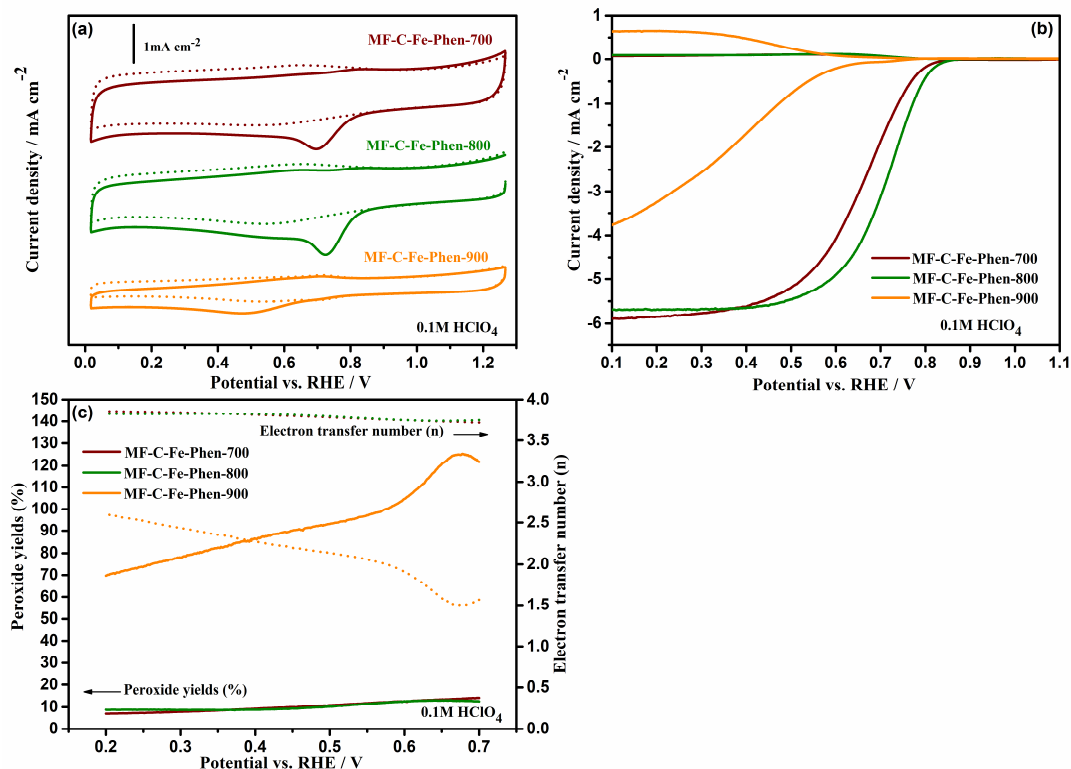

**Figure S3** (a) CV curves of MF-C-Fe-Phen- $x$  ( $x=700, 800, 900$ ) in O<sub>2</sub> or N<sub>2</sub>-saturated 0.1 M HClO<sub>4</sub> solution at a scan rate of 10 mV s<sup>-1</sup>. (b) Rotating ring disk electrode (RRDE) curves for MF-C-Fe-Phen- $x$  ( $x=700, 800, 900$ ) in O<sub>2</sub>-saturated 0.1 M HClO<sub>4</sub> solution at a scan rate of 10 mV s<sup>-1</sup> and a rotation rate of 1600 rpm. (c) The corresponding peroxide yield and electron transfer number in O<sub>2</sub>-saturated 0.1 M HClO<sub>4</sub> solution at various potentials based on the RRED dates.

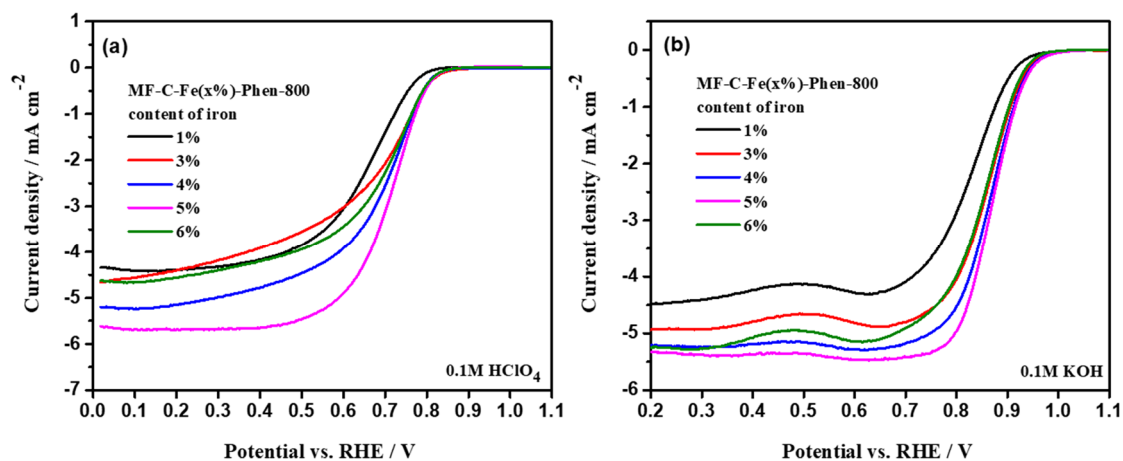

**Figure S4** LSV curves of MF-C-Fe( $x\%$ )-Phen-800 ( $x\%=1\%, 3\%, 4\%, 5\%, 6\%$ ) in O<sub>2</sub>-saturated at a scan rate of 10 mV s<sup>-1</sup> and a rotation rate of 1600 rpm in 0.1 M HClO<sub>4</sub> (a) and 0.1 M KOH solution (b).

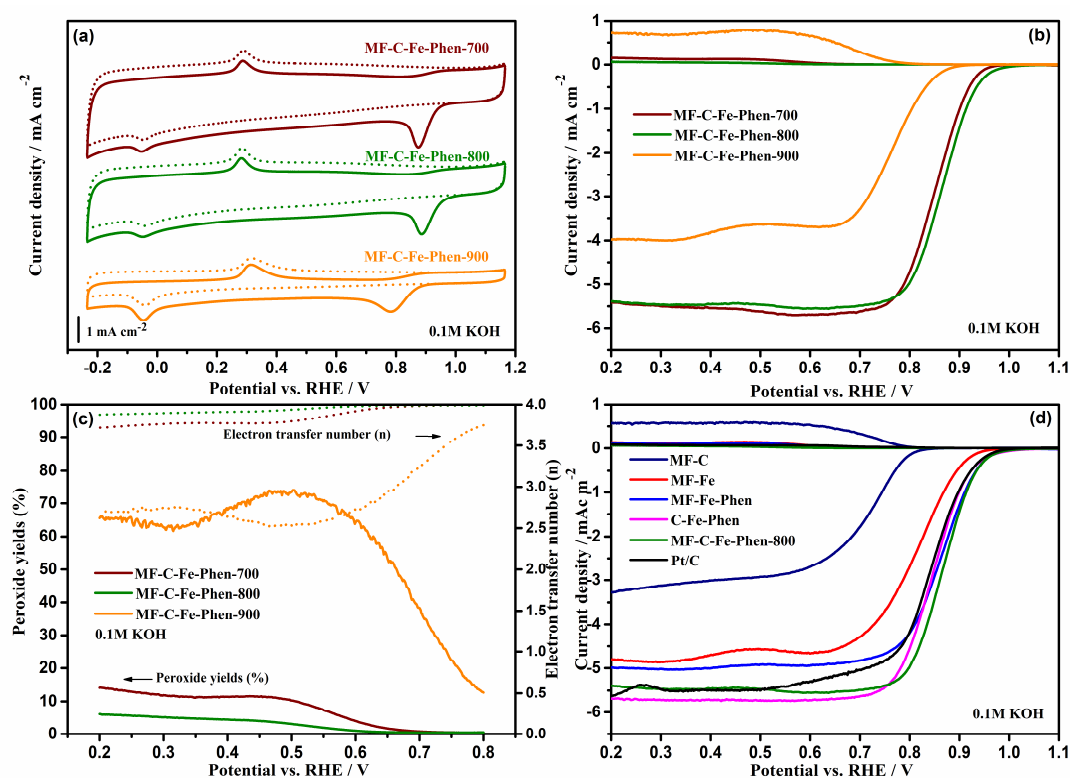

**Figure S5** (a) CV curves of MF-C-Fe-Phen-*x* (*x*=700, 800, 900) in O<sub>2</sub> or N<sub>2</sub>-saturated 0.1 M KOH solution at a scan rate of 10 mV s<sup>-1</sup>. (b) Rotating ring disk electrode (RRDE) curves for MF-C-Fe-Phen-*x* (*x*=700, 800, 900) in O<sub>2</sub>-saturated 0.1 M KOH solution at a scan rate of 10 mV s<sup>-1</sup> and a rotation rate of 1600 rpm. (c) The corresponding peroxide yield and electron transfer number in O<sub>2</sub>-saturated 0.1 M KOH solution at various potentials based on the RRED dates. (d) RRDE curves for MF-C, MF-Fe, MF-Fe-Phen, C-Fe-Phen, MF-C-Fe-Phen-800 and Pt/C in O<sub>2</sub>-saturated 0.1 M KOH solution at a scan rate of 10 mV s<sup>-1</sup> and a rotation rate of 1600 rpm.

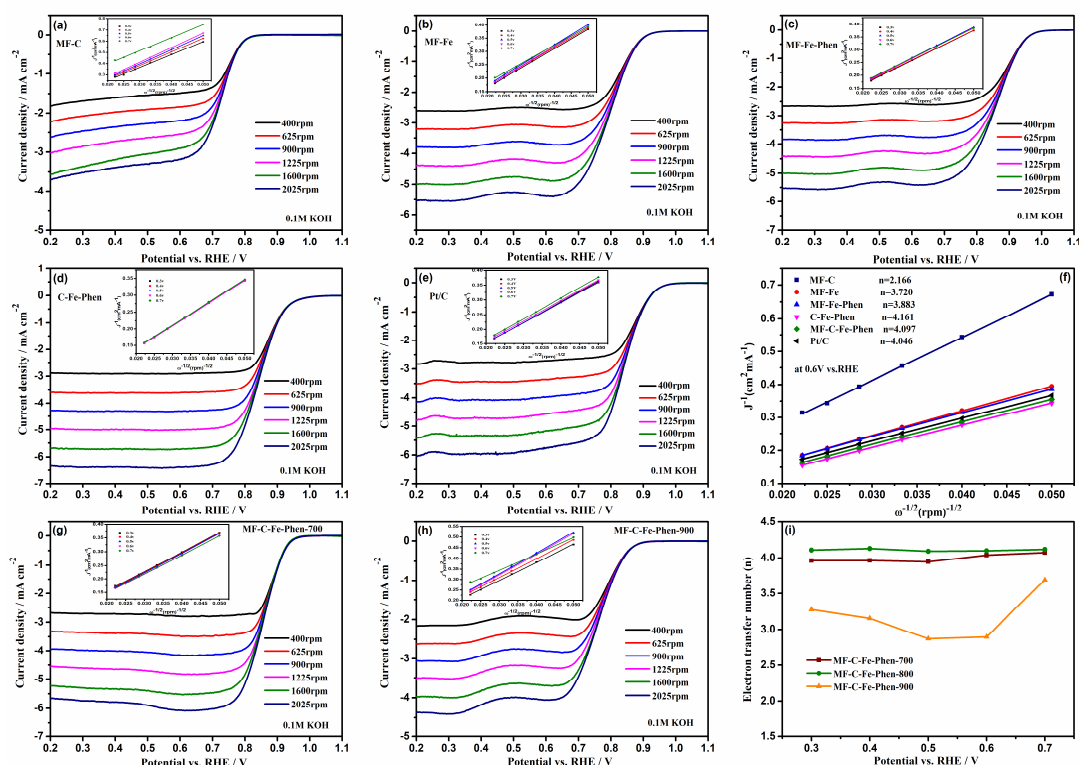

**Figure S6** LSV curves in O<sub>2</sub>-saturated 0.1 M KOH solution at a different rotation rate from 400 to 2025 rpm, the inset shows the K-L plots at the potential range of 0.3 to 0.7 V for (a) MF-C. (b) MF-Fe. (c) MF-Fe-Phen. (d) C-Fe-Phen. (e) Pt/C. (g) MF-C-Fe-Phen-700. (h) MF-C-Fe-Phen-900. (f) The K-L plots at the potential of 0.6 V (vs. RHE) for MF-C, MF-Fe, MF-Fe-Phen, C-Fe-Phen, MF-C-Fe-Phen-800 and Pt/C. and the corresponding electron transfer number calculated by the K-L equation. (i) Transferred electron number of MF-C-Fe-Phen-700, MF-C-Fe-Phen-800, MF-C-Fe-Phen-900 at the potential range of 0.3 to 0.7 V calculated by the K-L equation.

**Table S1** Textural properties of MF-C, MF-Fe, MF-Fe-Phen, C-Fe-Phen, MF-C-Fe-Phen-700, MF-C-Fe-Phen-800 and MF-C-Fe-Phen-900

| Sample           | S <sup>a</sup> <sub>BET</sub><br>(m <sup>2</sup> /g) | S <sup>b</sup> <sub>micro</sub><br>(m <sup>2</sup> /g) | S <sub>meso</sub><br>(m <sup>2</sup> /g) | V <sup>c</sup> <sub>total</sub><br>(cm <sup>3</sup> /g) | V <sup>d</sup> <sub>micro</sub><br>(cm <sup>3</sup> /g) | V <sub>meso</sub><br>(cm <sup>3</sup> /g) | Pore size <sup>e</sup><br>(nm) |                                      |
|------------------|------------------------------------------------------|--------------------------------------------------------|------------------------------------------|---------------------------------------------------------|---------------------------------------------------------|-------------------------------------------|--------------------------------|--------------------------------------|
|                  |                                                      |                                                        |                                          |                                                         |                                                         |                                           | Micro <sup>f</sup><br>(nm)     | D <sub>av</sub> <sup>g</sup><br>(nm) |
| MF-C             | 1455.31                                              | 501.83                                                 | 953.48                                   | 2.2006                                                  | 0.2533                                                  | 1.9473                                    | 0.631                          | 6.05                                 |
| MF-Fe            | 231.09                                               | 29.61                                                  | 201.48                                   | 0.4959                                                  | 0.0135                                                  | 0.4824                                    | 0.632                          | 8.58                                 |
| MF-Fe-Phen       | 517.84                                               | 96.94                                                  | 420.9                                    | 0.6955                                                  | 0.0446                                                  | 0.6509                                    | 0.612                          | 5.37                                 |
| C-Fe-Phen        | 818.87                                               | 452.27                                                 | 366.6                                    | 1.3769                                                  | 0.2328                                                  | 1.1441                                    | 0.582                          | 6.73                                 |
| MF-C-Fe-Phen-700 | 480.87                                               | 321.41                                                 | 159.46                                   | 0.4699                                                  | 0.1582                                                  | 0.3117                                    | 0.562                          | 3.91                                 |
| MF-C-Fe-Phen-800 | 807.24                                               | 434.34                                                 | 372.9                                    | 0.6424                                                  | 0.2210                                                  | 0.4214                                    | 0.580                          | 3.18                                 |
| MF-C-Fe-Phen-900 | 952.28                                               | 387.38                                                 | 564.9                                    | 0.7239                                                  | 0.1959                                                  | 0.528                                     | 0.615                          | 3.04                                 |

<sup>a</sup> Surface area determined by the BET method.

<sup>b</sup> Micropore surface area determined by t-Plot micropore area.

<sup>c</sup> Total pore volume calculated by the DFT method.

<sup>d</sup> Micropore volume determined by t-Plot micropore volume.

<sup>e</sup> the pore distribution curves determined by the DFT method.

<sup>f</sup> Micropore width determined by the HK method.

<sup>g</sup> Average pore width determined by Adsorption average pore width (4V/A by BET)

**Table S2** Elemental compositions of MF-C, MF-Fe, MF-Fe-Phen, C-Fe-Phen, MF-C-Fe-Phen-700, MF-C-Fe-Phen-800 and MF-C-Fe-Phen-900 determined by the XPS analysis.

| Samples          | C (at. %) | N (at. %) | O (at. %) | Fe (at. %) |
|------------------|-----------|-----------|-----------|------------|
| MF-C             | 78.18     | 1.03      | 20.79     | -          |
| MF-Fe            | 92.00     | 1.95      | 5.48      | 0.58       |
| MF-Fe-Phen       | 92.46     | 2.53      | 4.50      | 0.51       |
| C-Fe-Phen        | 92.61     | 2.21      | 4.79      | 0.39       |
| MF-C-Fe-Phen-700 | 82.83     | 2.59      | 14.19     | 0.39       |
| MF-C-Fe-Phen-800 | 89.32     | 3.28      | 6.90      | 0.50       |
| MF-C-Fe-Phen-900 | 91.13     | 1.61      | 6.84      | 0.42       |
